# Supplementary material for: Lymphocytes as Liver Damage Mirror of HCV Related Adipogenesis Deregulation
Source: PLoS One. 2014 Mar 21;9(3):e92343. doi: 10.1371/journal.pone.0092343 (PMC3962393; doi:10.1371/journal.pone.0092343)
Supplement: Table S2 — Microarray analysis of chronic HBV + Livers and PBMCs compared to HDs. (DOCX) [file pone.0092343.s003.docx]

Table 3: Adipogenesis modulation in chronic HBV + Livers and PBMCs compared to HDs

| | **GeneBank** |  | HBV + LIVERS | HBV PBMCS |  | | --- | --- | --- | --- | --- | | NM_001093 | ACACB | 0,00295 | 0,0017 | Acetyl-CoA carboxylase beta | | NM_001018082 | ADIG | 0,00955 | 0,0083 | Adipogenin | | NM_004797 | ADIPOQ | 0,00235 | 0,0011 | Adiponectin, C1Q and collagen domain containing | | NM_000024 | ADRB2 | 0,00135 | 0,0001 | Adrenergic, beta-2-, receptor, surface | | NM_000029 | AGT | 0,00195 | 0,0007 | Angiotensinogen (serpin peptidase inhibitor, clade A, member 8) | | NM_001147 | ANGPT2 | 0,00185 | 0,0006 | Angiopoietin 2 | | NM_003502 | AXIN1 | 0,00145 | 0,0002 | Axin 1 | | NM_001200 | BMP2 | 0,00925 | 0,008 | Bone morphogenetic protein 2 | | NM_130851 | BMP4 | 0,01495 | 0,025 | Bone morphogenetic protein 4 | | NM_001719 | BMP7 | 0,00645 | 0,056 | Bone morphogenetic protein 7 | | NM_053056 | CCND1 | 0,00555 | 0,0043 | Cyclin D1 | | NM_000075 | CDK4 | 0,00195 | 0,0007 | Cyclin-dependent kinase 4 | | NM_000389 | CDKN1A | 0,00135 | 0,0001 | Cyclin-dependent kinase inhibitor 1A (p21, Cip1) | | NM_004064 | CDKN1B | 0,00125 | 0 | Cyclin-dependent kinase inhibitor 1B (p27, Kip1) | | NM_004364 | CEBPA | 0,00235 | 0,0137 | CCAAT/enhancer binding protein (C/EBP), alpha | | NM_005194 | CEBPB | nt | 0,0089 | CCAAT/enhancer binding protein (C/EBP), beta | | NM_005195 | CEBPD | nt | 0,0016 | CCAAT/enhancer binding protein (C/EBP), delta | | NM_001928 | CFD | 0,00535 | 0,0003 | Complement factor D (adipsin) | | NM_004379 | CREB1 | 0,00195 | 0,0014 | CAMP responsive element binding protein 1 | | NM_004083 | DDIT3 | 0,00155 | 0,0089 | DNA-damage-inducible transcript 3 | | NM_000793 | DIO2 | 0,00875 | 0,0016 | Deiodinase, iodothyronine, type II | | NM_012242 | DKK1 | 0,00655 | 0,0089 | Dickkopf homolog 1 (Xenopus laevis) | | NM_003836 | DLK1 | 0,00575 | 0,0016 | Delta-like 1 homolog (Drosophila) | | NM_005225 | E2F1 | 0,01495 | 0,0003 | E2F transcription factor 1 | | NM_000399 | EGR2 | 0,01015 | 0,0075 | Early growth response 2 | | NM_001442 | FABP4 | 0,03065 | 0,0016 | Fatty acid binding protein 4, adipocyte | | NM_004104 | FASN | 0,02935 | 0,0003 | Fatty acid synthase | | NM_000800 | FGF1 | 0,03045 | 0,0014 | Fibroblast growth factor 1 (acidic) | | NM_004465 | FGF10 | 0,03735 | 0,0083 | Fibroblast growth factor 10 | | NM_002006 | FGF2 | 0,03055 | 0,0015 | Fibroblast growth factor 2 (basic) | | NM_005251 | FOXC2 | 0,03165 | 0,0026 | Forkhead box C2 (MFH-1, mesenchyme forkhead 1) | | NM_002015 | FOXO1 | 0,02925 | 0,0002 | Forkhead box O1 | | NM_032638 | GATA2 | 0,03065 | 0,0016 | GATA binding protein 2 | | NM_002051 | GATA3 | 0,02935 | 0,0011 | GATA binding protein 3 | | NM_005524 | HES1 | 0,37495 | 0,0001 | Hairy and enhancer of split 1, (Drosophila) | | NM_000208 | INSR | 0,15025 | 0,0003 | Insulin receptor | | NM_005544 | IRS1 | 0,0016 | 0,03065 | Insulin receptor substrate 1 | | NM_003749 | IRS2 | 0,0003 | 0,02935 | Insulin receptor substrate 2 | | NM_002228 | JUN | 0,0942 | 0,0003 | Jun proto-oncogene | | NM_014079 | KLF15 | 3,56 | 2,54 | Kruppel-like factor 15 | | NM_016270 | KLF2 | 0,0942 | 0,0053 | Kruppel-like factor 2 (lung) | | NM_016531 | KLF3 | 0,0949 | 0,001 | Kruppel-like factor 3 (basic) | | NM_004235 | KLF4 | 5,65 | 4,74 | Kruppel-like factor 4 (gut) | | NM_000230 | LEP | 0,1143698 | 0,0468 | Leptin | | NM_005357 | LIPE | 0,0815698 | 0,014 | Lipase, hormone-sensitive | | NM_005572 | LMNA | 1,56 | 1,11 | Lamin A/C | | NM_000237 | LPL | 0,0322698 | 0,0067 | Lipoprotein lipase | | NM_002335 | LRP5 | 6,33 | 5,45 | Low density lipoprotein receptor-related protein 5 | | NM_001315 | MAPK14 | 2 | 3,2 | Mitogen-activated protein kinase 14 | | NM_006540 | NCOA2 | 4,56 | 3,65 | Nuclear receptor coactivator 2 | | NM_006312 | NCOR2 | 0,0265698 | 0,001 | Nuclear receptor corepressor 2 | | NM_021969 | NR0B2 | 0,0344698 | 0,0089 | Nuclear receptor subfamily 0, group B, member 2 | | NM_005693 | NR1H3 | 0,0635698 | 0,038 | Nuclear receptor subfamily 1, group H, member 3 | | NM_005011 | NRF1 | 0,0506698 | 0,0251 | Nuclear respiratory factor 1 | | NM_005036 | PPARA | 2,56 | 3,45 | Peroxisome proliferator-activated receptor alpha | | NM_006238 | PPARD | 5,45 | 5,98 | Peroxisome proliferator-activated receptor delta | | NM_015869 | PPARG | 0,0304698 | 0,0049 | Peroxisome proliferator-activated receptor gamma | | NM_013261 | PPARGC1A | 0,6574698 | 0,6319 | Peroxisome proliferator-activated receptor gamma, coactivator 1 alpha | | NM_133263 | PPARGC1B |  |  | Peroxisome proliferator-activated receptor gamma, coactivator 1 beta | | NM_199454 | PRDM16 | 0,0437698 | 0,0182 | PR domain containing 16 | | NM_000321 | RB1 | 6,15 | 6,45 | Retinoblastoma 1 | | NM_020415 | RETN | 21 | 19,88 | Resistin | | NM_175636 | RUNX1T1 | 0,0374698 | 0,0119 | Runt-related transcription factor 1; translocated to, 1 (cyclin D-related) | | NM_002957 | RXRA | 0,3220698 | 0,2965 | Retinoid X receptor, alpha | | NM_003012 | SFRP1 | 0,0494698 | 0,0239 | Secreted frizzled-related protein 1 | | NM_003015 | SFRP5 | 6,88 | 5,09 | Secreted frizzled-related protein 5 | | NM_000193 | SHH | 0,2432698 | 0,2177 | Sonic hedgehog | | NM_012238 | SIRT1 | 2,95 | 1,87 | Sirtuin 1 | | NM_012237 | SIRT2 | 3,65 | 4,45 | Sirtuin 2 | | NM_012239 | SIRT3 | 3,56 | 3 | Sirtuin 3 | | NM_001042 | SLC2A4 | 0,066 | 0,0405 | Solute carrier family 2 (facilitated glucose transporter), member 4 | | NM_005417 | SRC | nt | 5,00 | V-src sarcoma (Schmidt-Ruppin A-2) viral oncogene homolog (avian) | | NM_004176 | SREBF1 | 12,36 | 11,02 | Sterol regulatory element binding transcription factor 1 | | NM_000116 | TAZ | 1,45 | 3,00 | Tafazzin | | NM_030756 | TCF7L2 | 1,54 | 0,73 | Transcription factor 7-like 2 (T-cell specific, HMG-box) | | NM_004089 | TSC22D3 | 0,0255698 | 0 | TSC22 domain family, member 3 | | NM_000474 | TWIST1 | 0,0392698 | 0,0137 | Twist homolog 1 (Drosophila) | | NM_021833 | UCP1 | 0,0256698 | 0,0001 | Uncoupling protein 1 (mitochondrial, proton carrier) | | NM_000376 | VDR | 0,0255698 | 0 | Vitamin D (1,25- dihydroxyvitamin D3) receptor | | NM_005430 | WNT1 | 0,0255698 | 0 | Wingless-type MMTV integration site family, member 1 | | NM_003394 | WNT10B | 5,56 | 6,64 | Wingless-type MMTV integration site family, member 10B | | NM_033131 | WNT3A | nt | 0 | Wingless-type MMTV integration site family, member 3A | | NM_003392 | WNT5A | 0,6597698 | 0,6342 | Wingless-type MMTV integration site family, member 5A | | NM_032642 | WNT5B | 0,2764698 | 0,2509 | Wingless-type MMTV integration site family, member 5B | |  |  |  |  |
| --- | --- | --- | --- | --- | --- | --- | --- | --- | --- | --- | --- | --- | --- | --- | --- | --- | --- | --- | --- | --- | --- | --- | --- | --- | --- | --- | --- | --- | --- | --- | --- | --- | --- | --- | --- | --- | --- | --- | --- | --- | --- | --- | --- | --- | --- | --- | --- | --- | --- | --- | --- | --- | --- | --- | --- | --- | --- | --- | --- | --- | --- | --- | --- | --- | --- | --- | --- | --- | --- | --- | --- | --- | --- | --- | --- | --- | --- | --- | --- | --- | --- | --- | --- | --- | --- | --- | --- | --- | --- | --- | --- | --- | --- | --- | --- | --- | --- | --- | --- | --- | --- | --- | --- | --- | --- | --- | --- | --- | --- | --- | --- | --- | --- | --- | --- | --- | --- | --- | --- | --- | --- | --- | --- | --- | --- | --- | --- | --- | --- | --- | --- | --- | --- | --- | --- | --- | --- | --- | --- | --- | --- | --- | --- | --- | --- | --- | --- | --- | --- | --- | --- | --- | --- | --- | --- | --- | --- | --- | --- | --- | --- | --- | --- | --- | --- | --- | --- | --- | --- | --- | --- | --- | --- | --- | --- | --- | --- | --- | --- | --- | --- | --- | --- | --- | --- | --- | --- | --- | --- | --- | --- | --- | --- | --- | --- | --- | --- | --- | --- | --- | --- | --- | --- | --- | --- | --- | --- | --- | --- | --- | --- | --- | --- | --- | --- | --- | --- | --- | --- | --- | --- | --- | --- | --- | --- | --- | --- | --- | --- | --- | --- | --- | --- | --- | --- | --- | --- | --- | --- | --- | --- | --- | --- | --- | --- | --- | --- | --- | --- | --- | --- | --- | --- | --- | --- | --- | --- | --- | --- | --- | --- | --- | --- | --- | --- | --- | --- | --- | --- | --- | --- | --- | --- | --- | --- | --- | --- | --- | --- | --- | --- | --- | --- | --- | --- | --- | --- | --- | --- | --- | --- | --- | --- | --- | --- | --- | --- | --- | --- | --- | --- | --- | --- | --- | --- | --- | --- | --- | --- | --- | --- | --- | --- | --- | --- | --- | --- | --- | --- | --- | --- | --- | --- | --- | --- | --- | --- | --- | --- | --- | --- | --- | --- | --- | --- | --- | --- | --- | --- | --- | --- | --- | --- | --- | --- | --- | --- | --- | --- | --- | --- | --- | --- | --- | --- | --- | --- | --- | --- | --- | --- | --- | --- | --- | --- | --- | --- | --- | --- | --- | --- | --- | --- | --- | --- | --- | --- | --- | --- | --- | --- | --- | --- | --- | --- | --- | --- | --- | --- | --- | --- | --- | --- | --- | --- | --- | --- | --- | --- | --- | --- | --- | --- | --- | --- | --- | --- | --- | --- | --- | --- | --- | --- | --- | --- | --- | --- | --- | --- | --- | --- | --- | --- | --- | --- | --- | --- | --- | --- |
|  |  |  |  |  |
|  |  |  |  |  |
|  |  |  |  |  |
|  |  |  |  |  |
|  |  |  |  |  |
|  |  |  |  |  |
|  |  |  |  |  |
|  |  |  |  |  |
